# Supplementary material for: A sex difference in the response of the rodent postsynaptic density to synGAP haploinsufficiency
Source: eLife journal article supplement (doi:10.7554/elife.52656), 2020-01-15
Supplement: supp [file elife-52656-supp-v1.zip]

Archive with 6 entries (6 files):
- elife_poa_e52656_Figure_3_figure_supplement_3.tif
- elife_poa_e52656_Figure_3_figure_supplement_1.tif
- elife_poa_e52656_Figure_2_figure_supplement_1.tif
- elife_poa_e52656_Supplementary_file_1.pdf
- elife_poa_e52656_Figure_3_figure_supplement_2.tif
- elife_poa_e52656_Transparent_Reporting_File.pdf
