# Supplementary material for: A sex difference in the response of the rodent postsynaptic density to synGAP haploinsufficiency
Source: eLife journal article supplement (doi:10.7554/elife.52656), 2020-01-15
Supplement: supp [file elife-52656-supp-v1.zip › elife_poa_e52656_Supplementary_file_1.pdf]

**Supplementary File 1.** Example calculations of synGAP/PSD-95 ratio and TARPs/PSD-95 ratio for animals 33 and 34.

The Table shows the steps to calculate a synGAP/PSD-95 ratio and a TARPs/PSD-95 ratio from digital data recorded from one pair of gels containing samples from animals 33 and 34 (see Figure 1-figure supplement 1). Data were collected from at least 3 technical replicates of synGAP gel lanes for each animal and usually 6 technical replicates of target gel lanes. The resulting ratios were averaged.

| Animal ID | Signal            | Intensity | Signal Intensity - Bkg. | synGAP/PSD-95 Ratio |
|-----------|-------------------|-----------|-------------------------|---------------------|
| 33        | PSD95             | 6620000   | 2540000                 | 0.489               |
| 33        | PSD95_Background  | 4080000   |                         |                     |
| 33        | SynGAP            | 1720000   | 1242000                 |                     |
| 33        | SynGAP_Background | 478000    |                         |                     |
| 34        | PSD95             | 5800000   | 1970000                 | 0.686               |
| 34        | PSD95_Background  | 3830000   |                         |                     |
| 34        | SynGAP            | 1800000   | 1351000                 |                     |
| 34        | SynGAP_Background | 449000    |                         |                     |
| Animal ID | Signal            | Intensity | Signal Intensity - Bkg. | TARPs/PSD-95 Ratio  |
| 33        | PSD95             | 5460000   | 2560000                 | 0.104               |
| 33        | PSD95_Background  | 2900000   |                         |                     |
| 33        | TARPs             | 1170000   | 265000                  |                     |
| 33        | TARPs_Background  | 905000    |                         |                     |
| 34        | PSD95             | 3880000   | 1760000                 | 0.092               |
| 34        | PSD95_Background  | 2120000   |                         |                     |
| 34        | TARPs             | 853000    | 162000                  |                     |
| 34        | TARPs_Background  | 691000    |                         |                     |
