# Supplementary figures and images for: A sex difference in the response of the rodent postsynaptic density to synGAP haploinsufficiency
Source: eLife journal article supplement (doi:10.7554/elife.52656), 2020-01-15

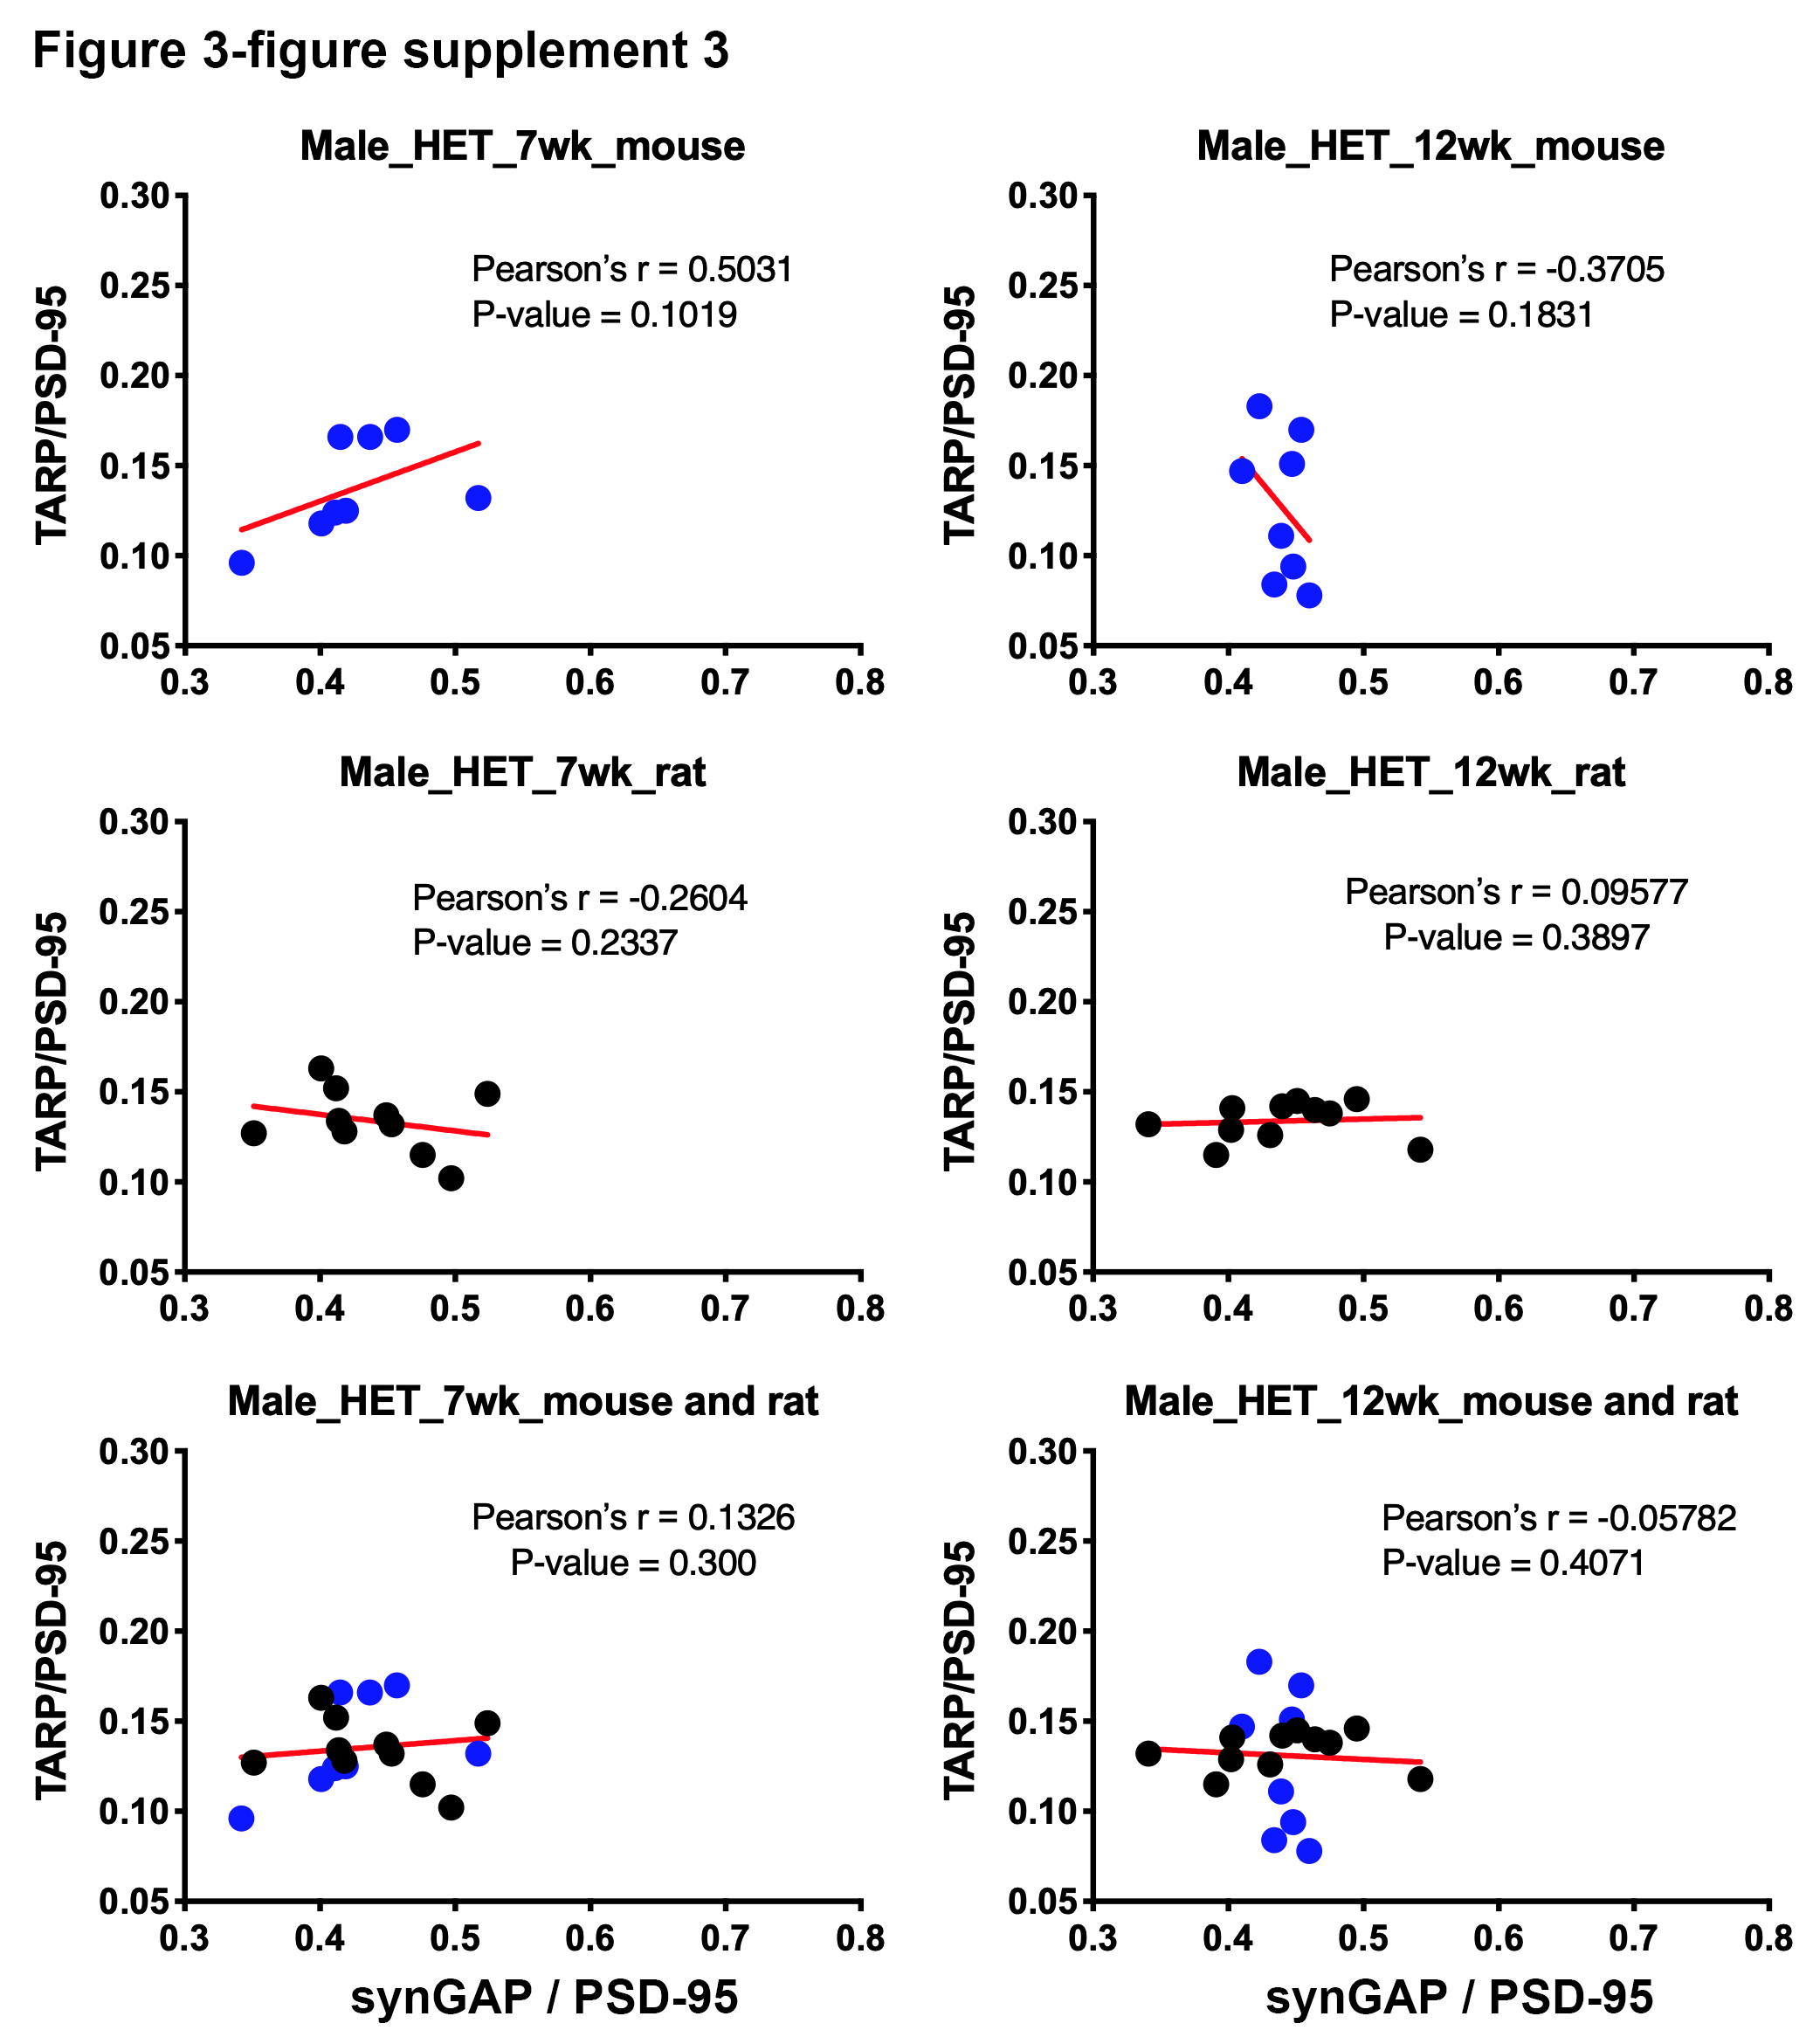

Supplement: supp [file elife-52656-supp-v1.zip › elife_poa_e52656_Figure_3_figure_supplement_3.tif]

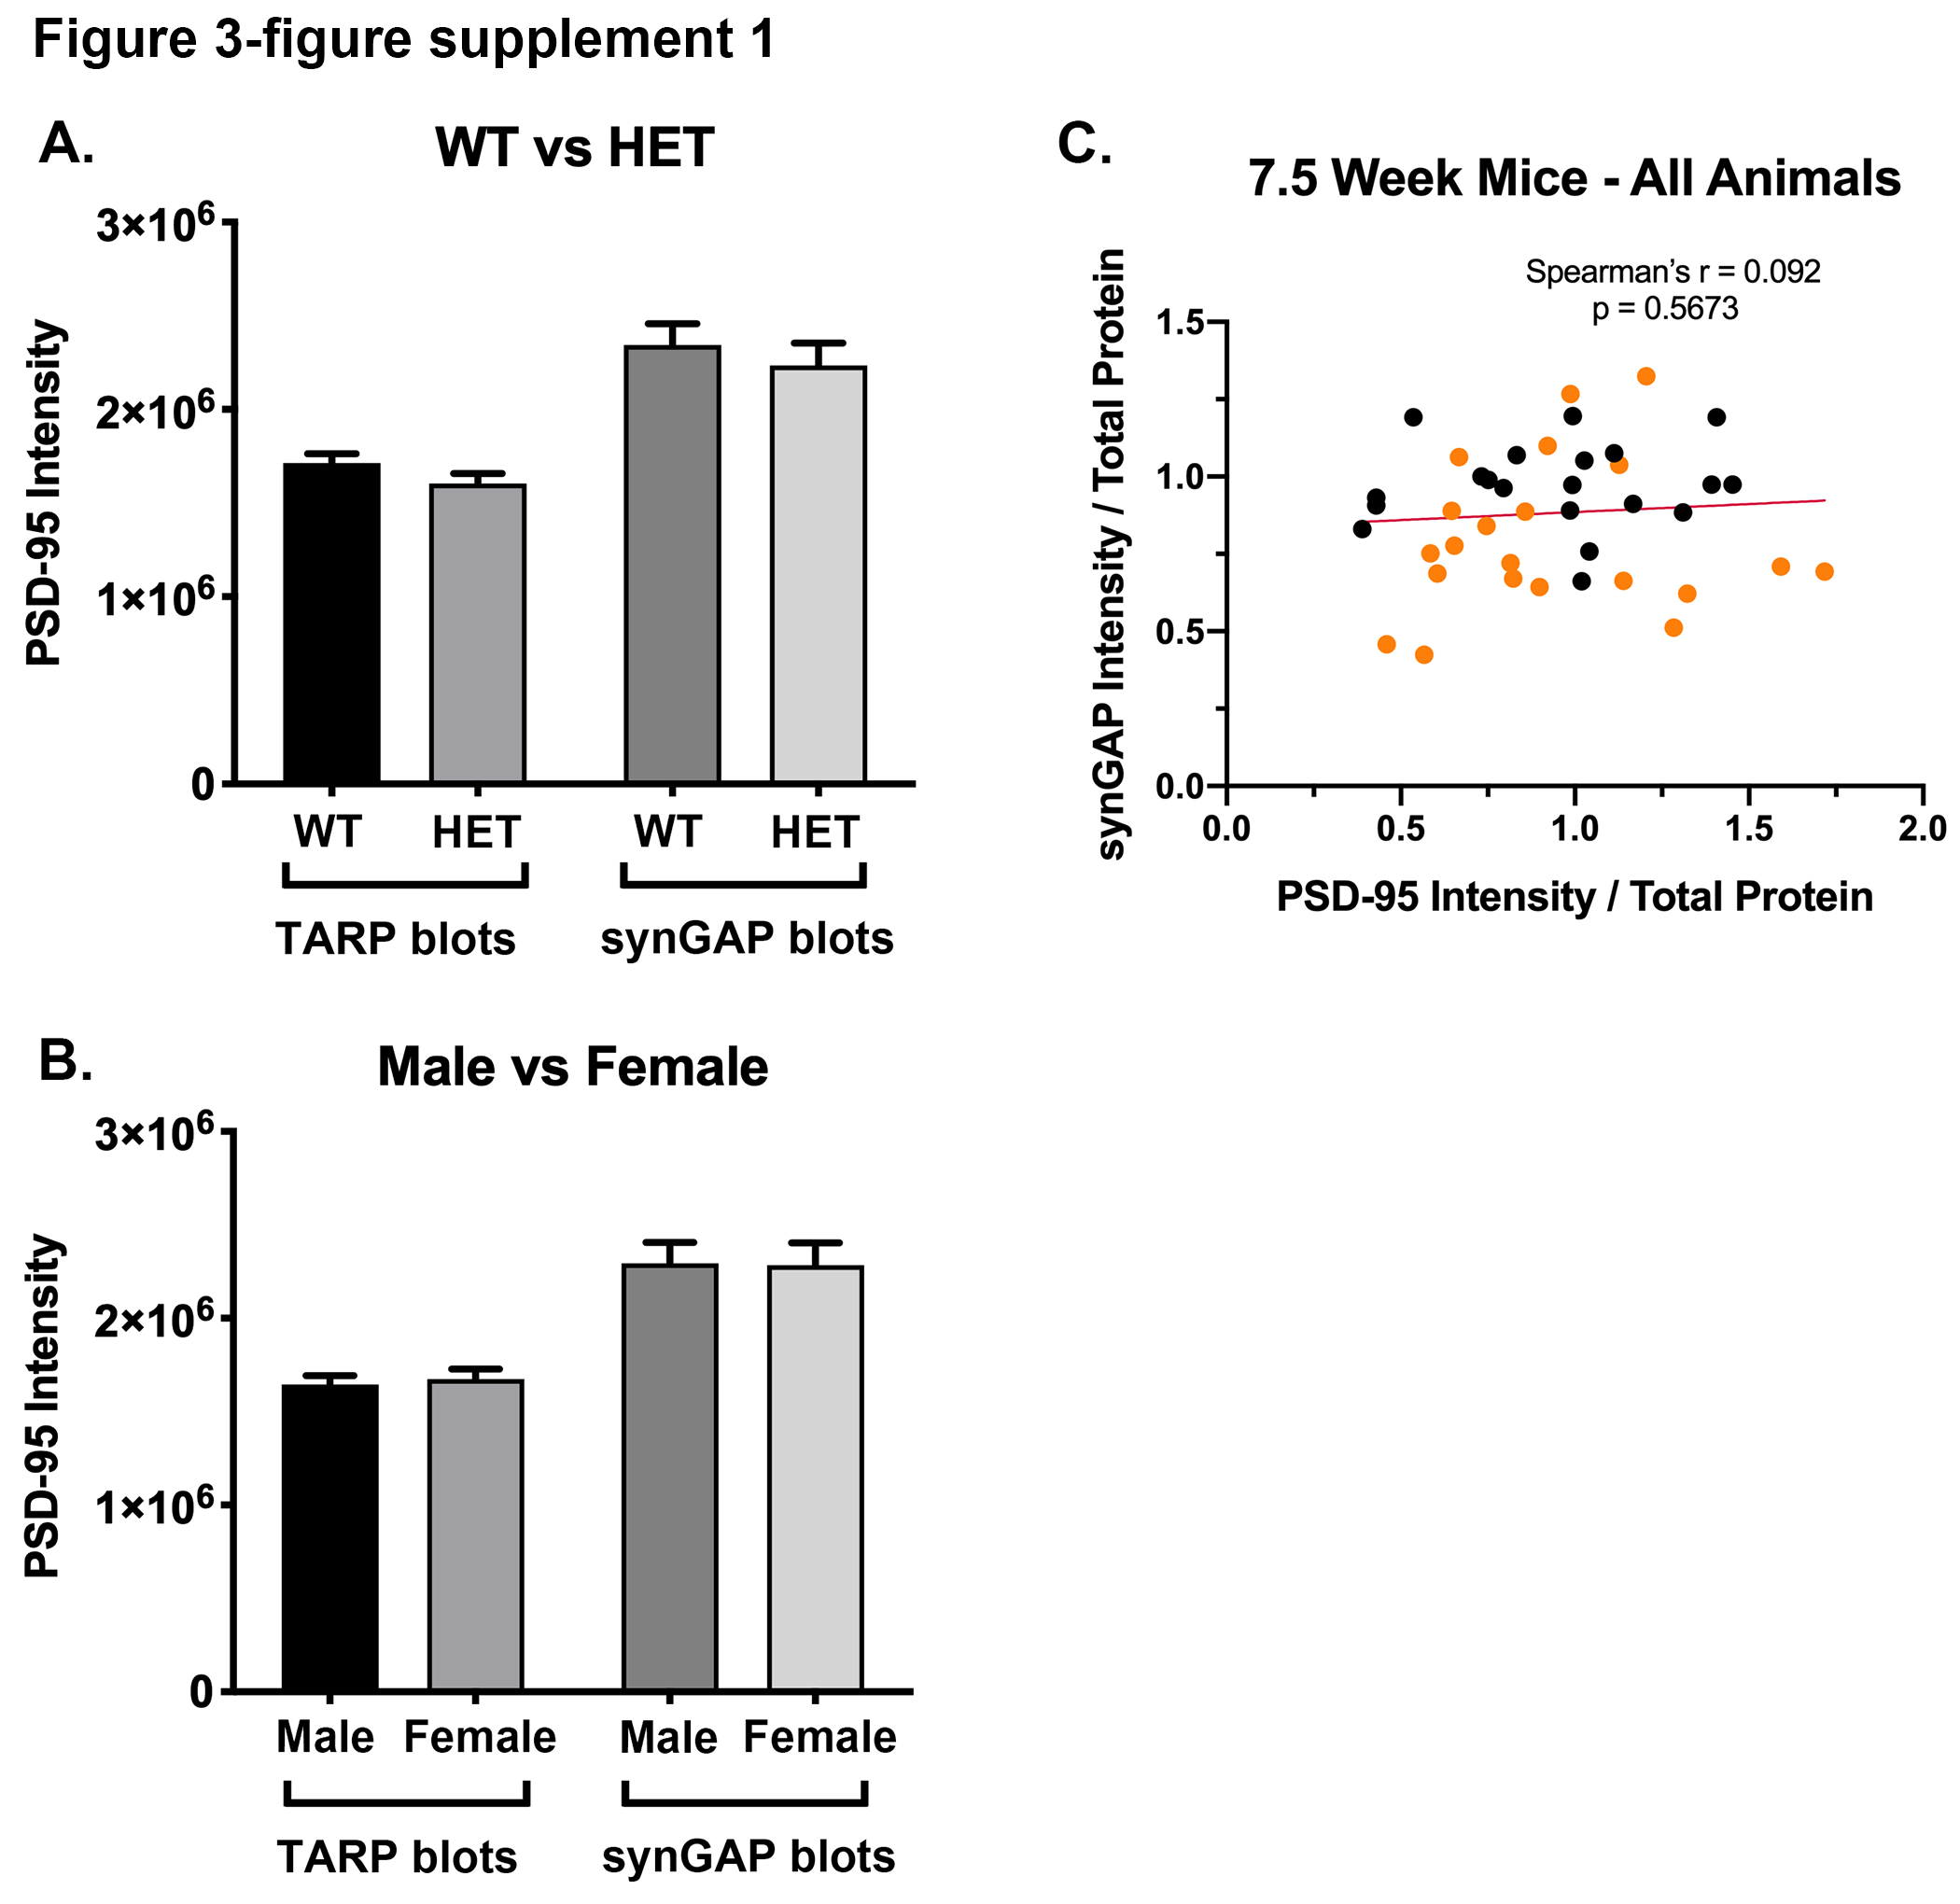

Supplement: supp [file elife-52656-supp-v1.zip › elife_poa_e52656_Figure_3_figure_supplement_1.tif]

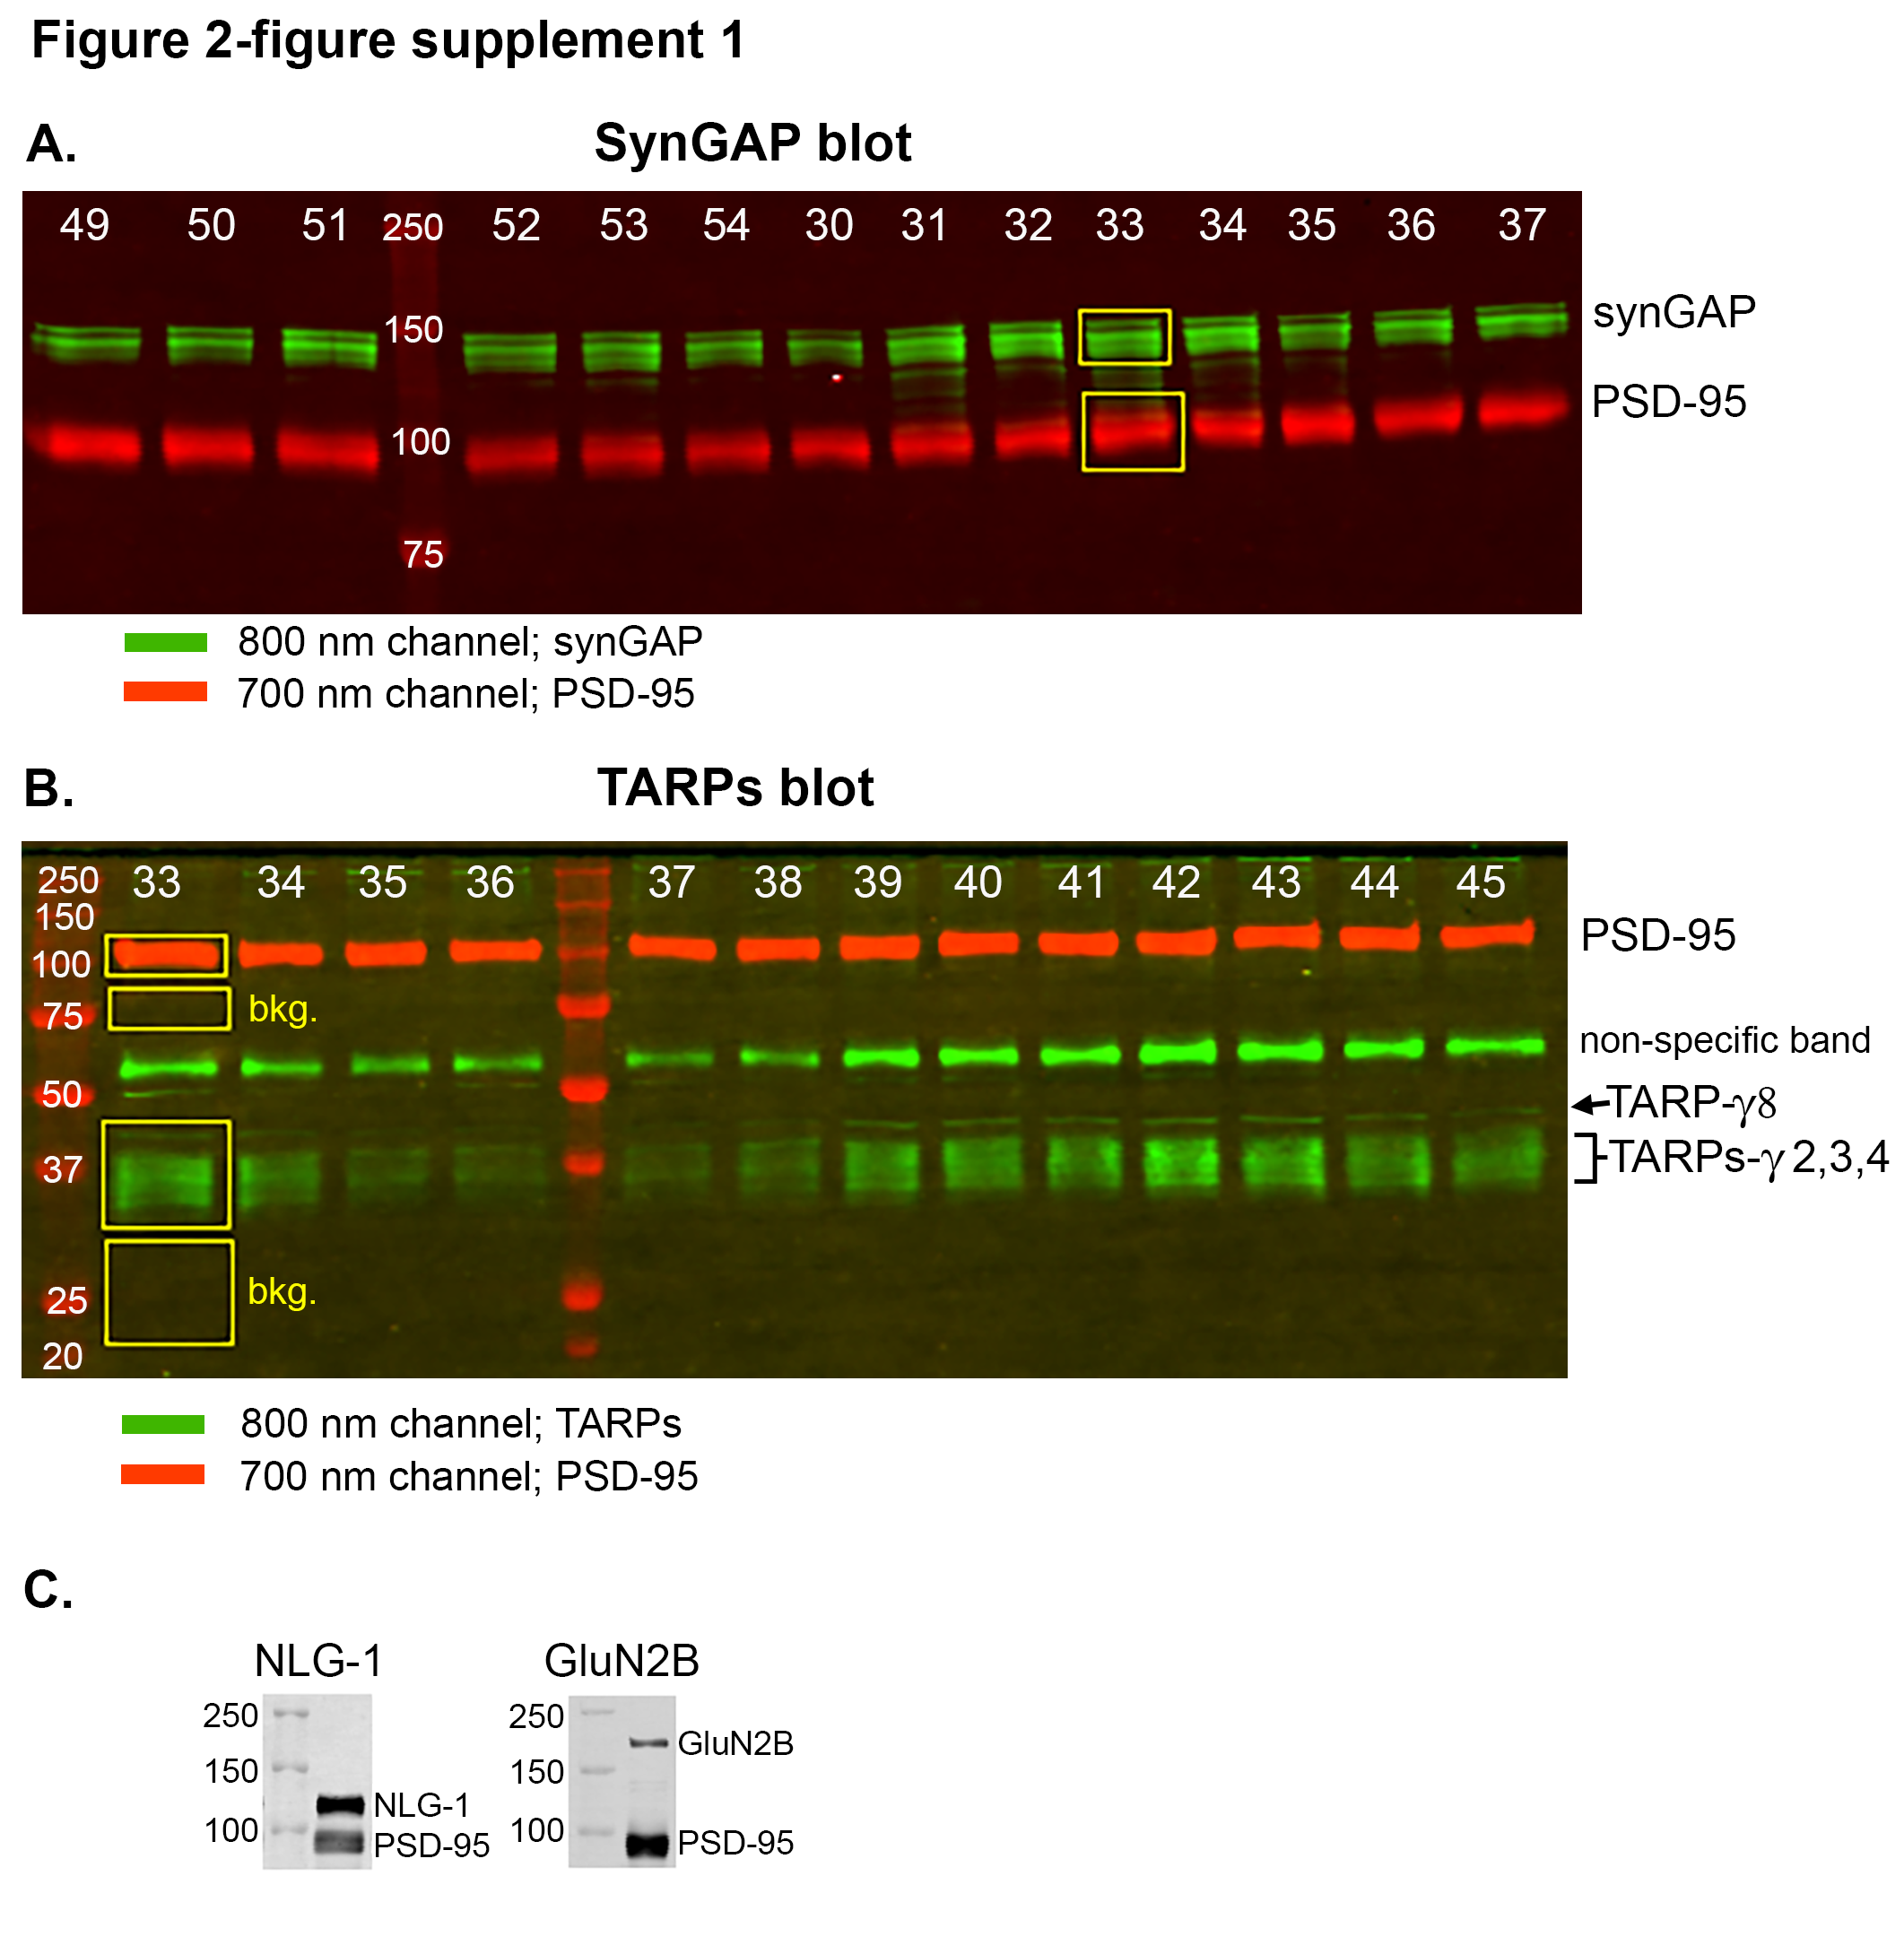

Supplement: supp [file elife-52656-supp-v1.zip › elife_poa_e52656_Figure_2_figure_supplement_1.tif]

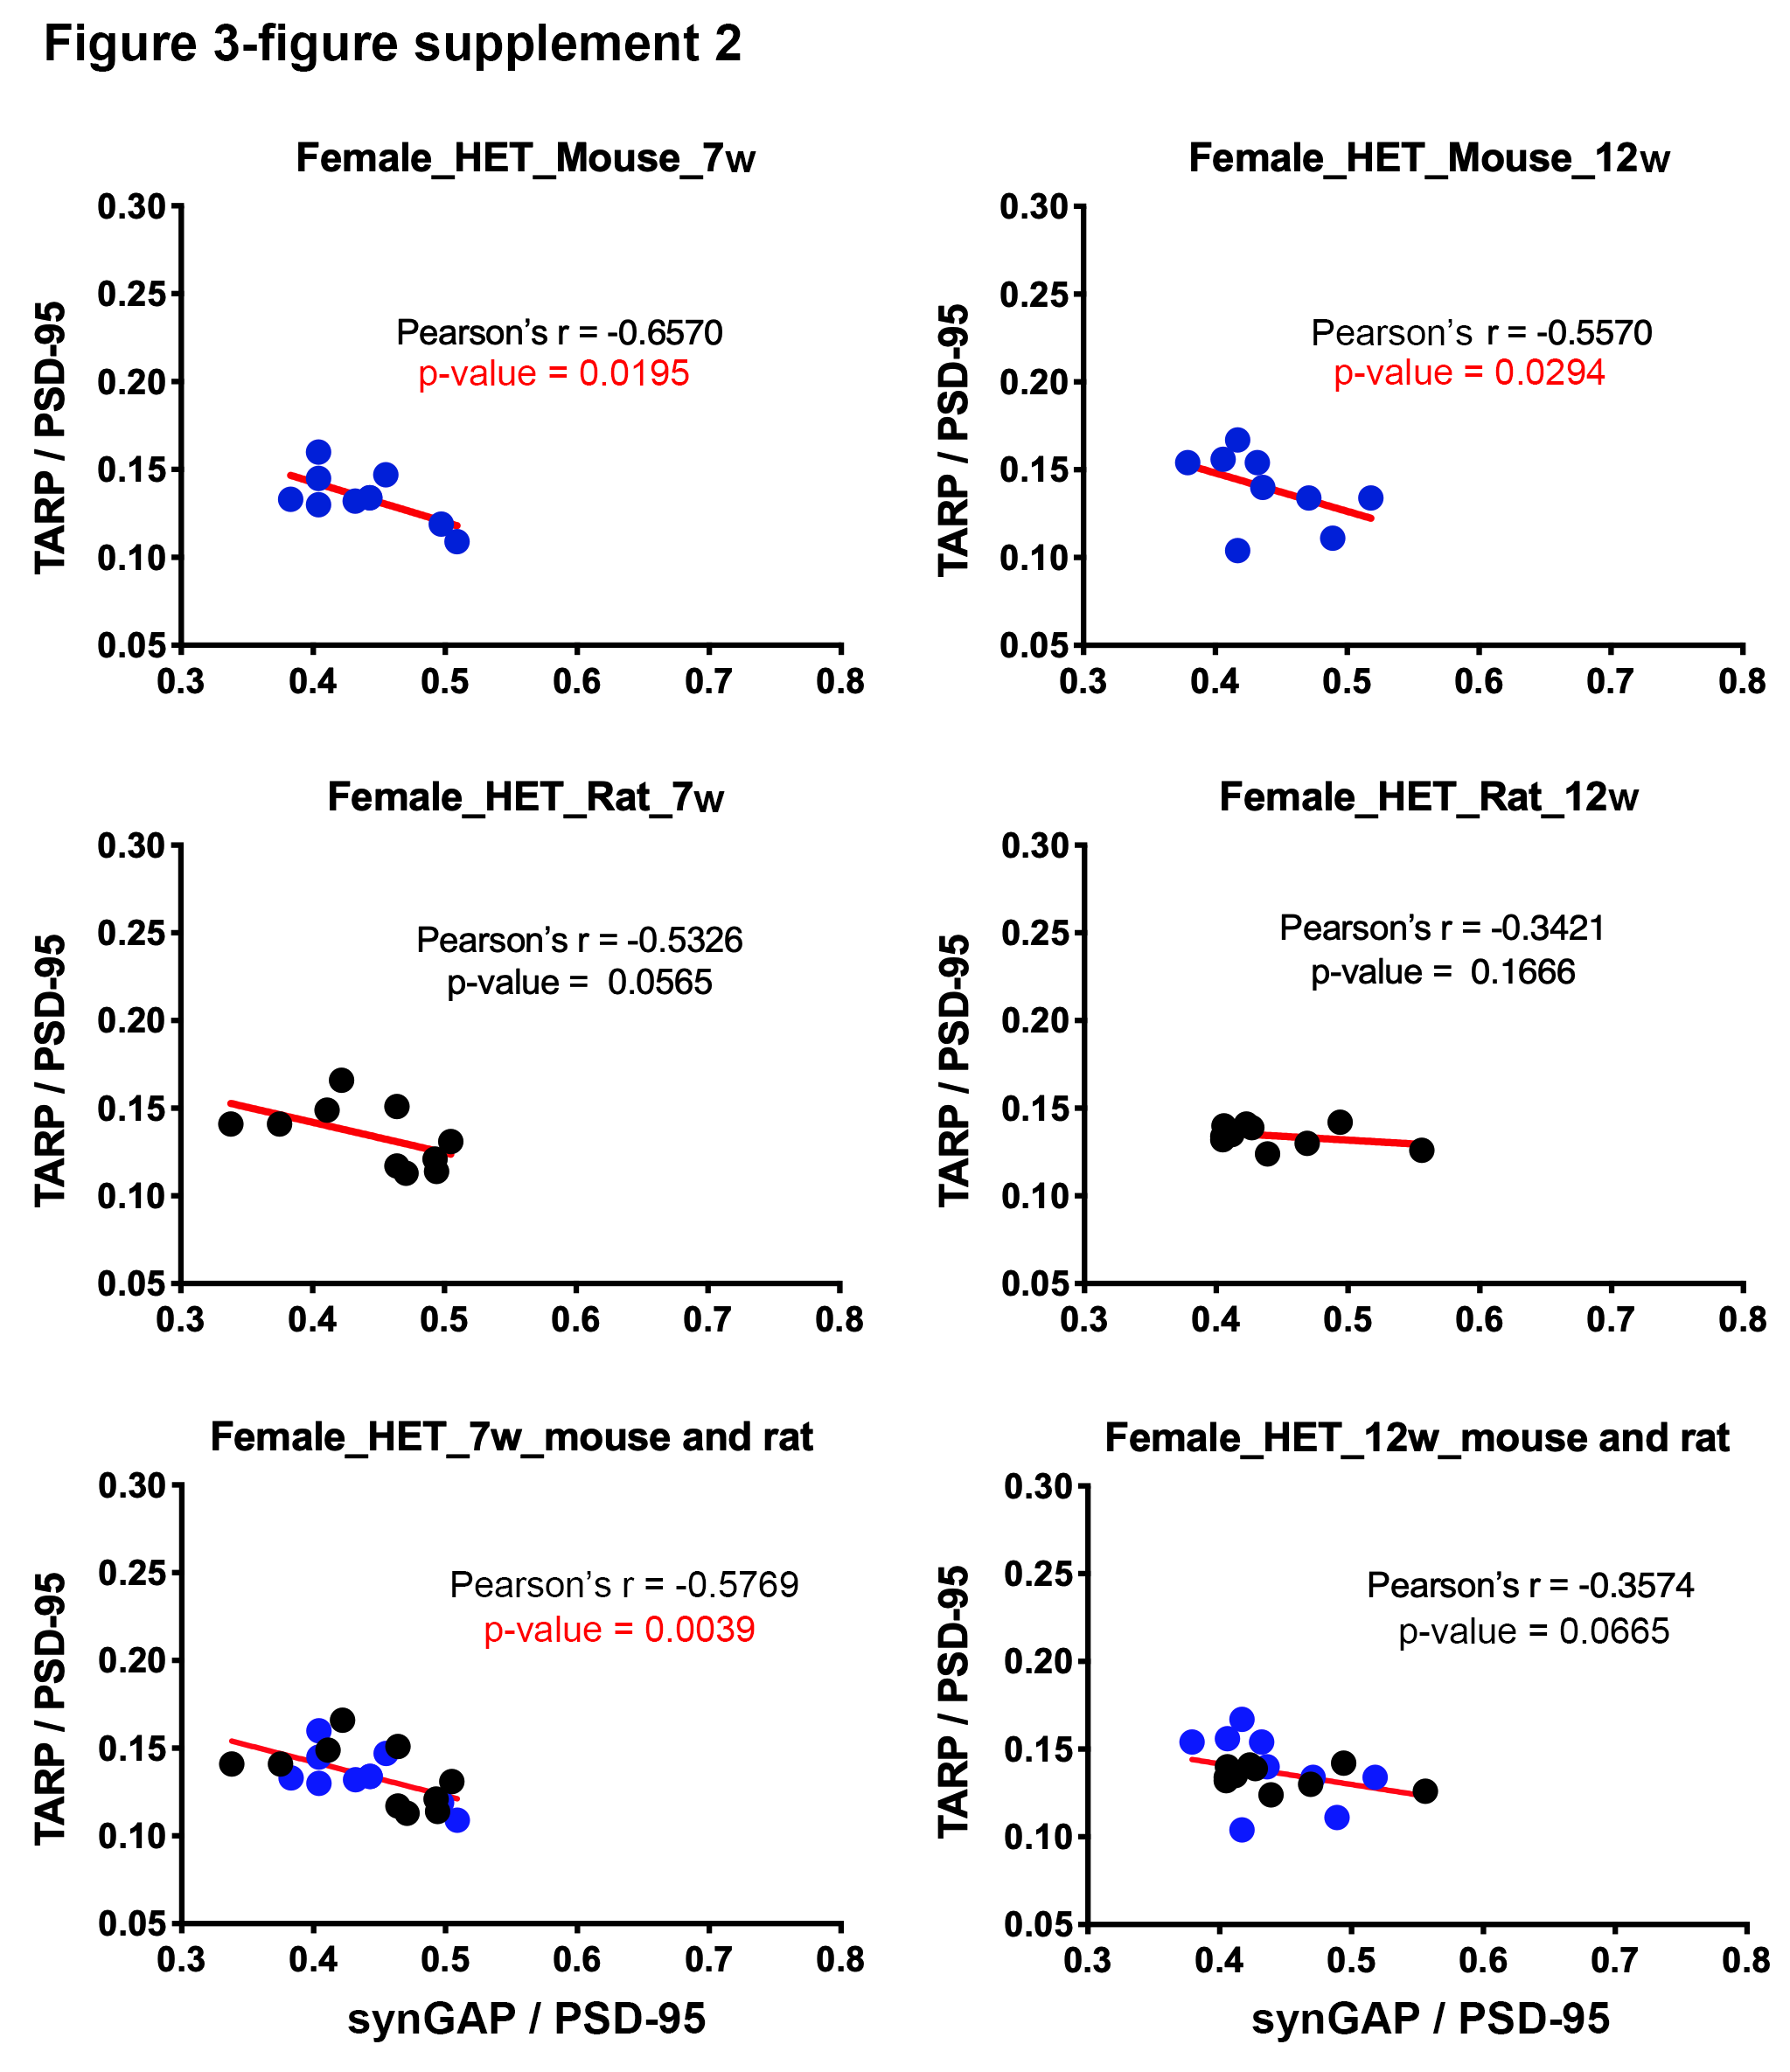

Supplement: supp [file elife-52656-supp-v1.zip › elife_poa_e52656_Figure_3_figure_supplement_2.tif]
